# Supplementary material for: Discovery of Potential Plant-Derived Peptide Deformylase (PDF) Inhibitors for Multidrug-Resistant Bacteria Using Computational Studies
Source: MDPI journal article supplement (doi:10.3390/jcm7120563), 2018-12-17
Supplement: s1 [file s1]

A

Docking of cocrystal into the proteins  
active site employing CDOCKER

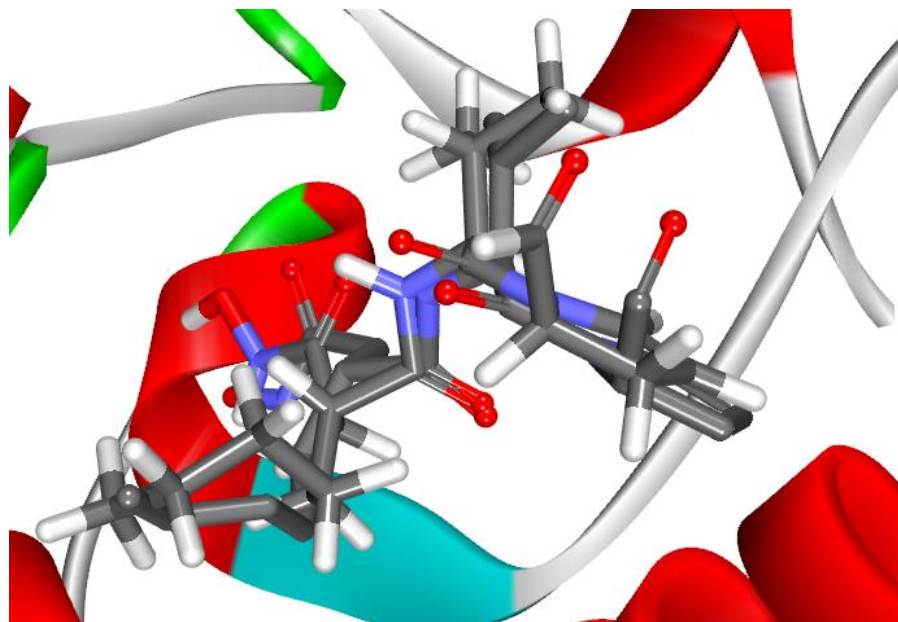

Docking of cocrystal into the proteins  
active site employing GOLD

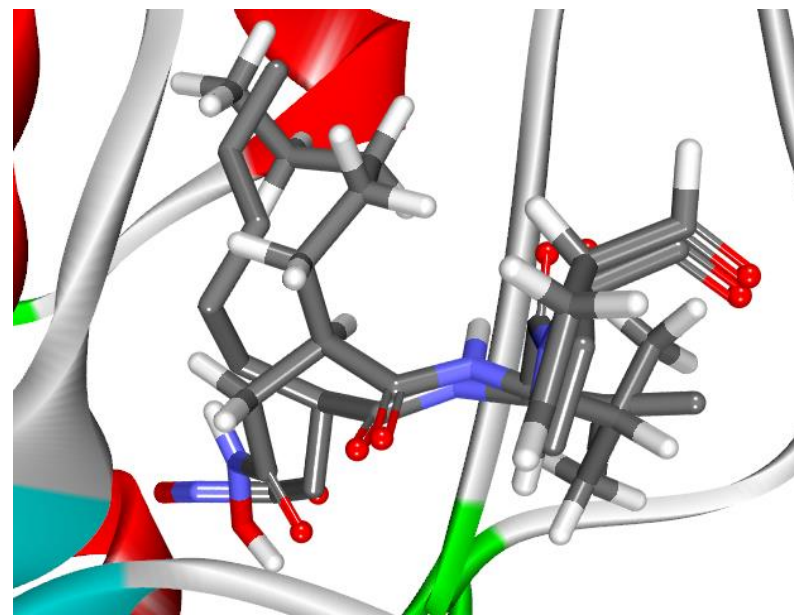

**Supplementary Figure 1.** Evaluation of the docking parameters

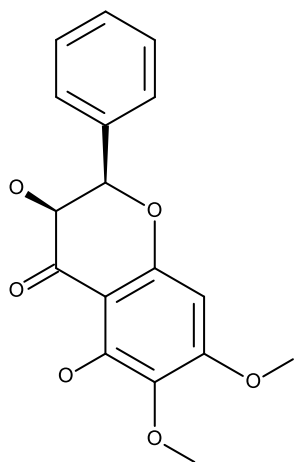

**Compound 1**

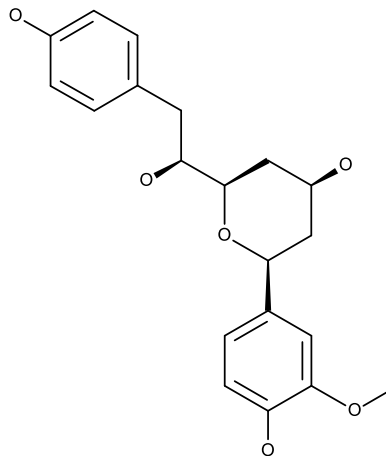

**Compound 2**

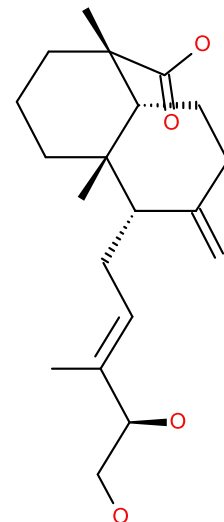

**Compound 3**

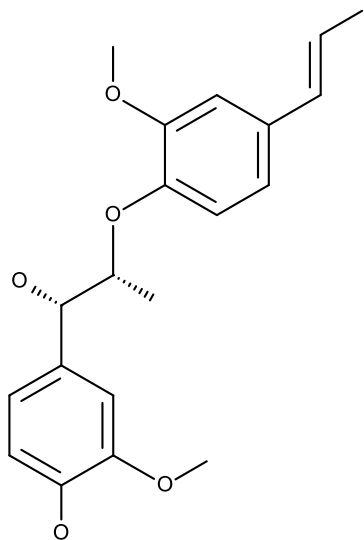

**Compound 4**

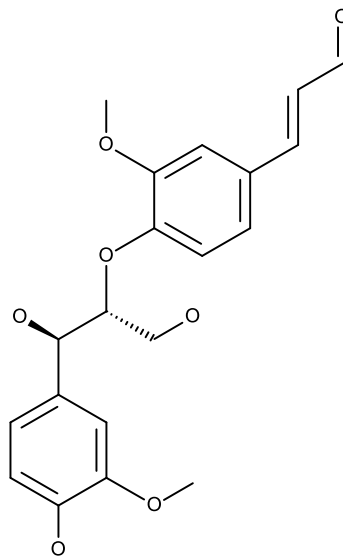

**Compound 5**

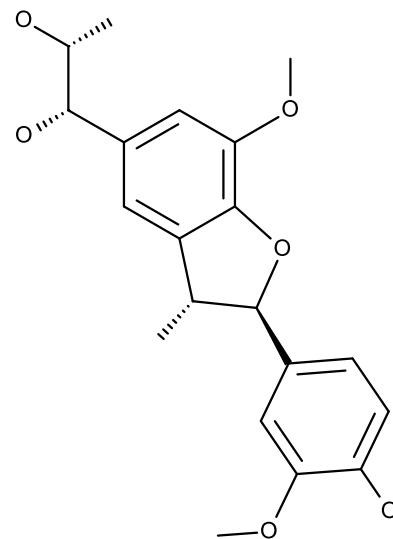

**Compound 6**

**Supplementary Figure 2. 2D structures of six compounds**

Diagram illustrating the interaction of a protein-ligand complex. The protein structure is shown in blue, with three specific residues highlighted in yellow and labeled A, B, and C. The ligand is shown in red and orange. Surrounding the protein are 15 circles, each representing a different amino acid residue, color-coded by type: green for polar/charged, yellow for non-polar, and pink for aromatic. Dashed lines indicate interactions between the protein residues and the ligand.

| Residue   | Type          | Color  |
|-----------|---------------|--------|
| VAL A:59  | Non-polar     | Yellow |
| VAL A:151 | Non-polar     | Yellow |
| HIS A:154 | Aromatic      | Pink   |
| GLU A:155 | Polar/charged | Green  |
| GLY A:60  | Polar/charged | Green  |
| LEU A:112 | Non-polar     | Yellow |
| CSD A:111 | Polar/charged | Green  |
| GLY A:58  | Polar/charged | Green  |
| SER A:57  | Polar/charged | Green  |
| TYR A:147 | Aromatic      | Pink   |
| ASN A:117 | Polar/charged | Green  |
| ARG A:56  | Polar/charged | Green  |
| GLY A:110 | Polar/charged | Green  |
| GLU A:109 | Polar/charged | Green  |
| GLY A:108 | Polar/charged | Green  |
| GLU A:185 | Polar/charged | Green  |
| LEU A:105 | Non-polar     | Yellow |

**Hit3**

Residues shown in green circles:

- ILE A:150
- GLU A:109
- LEU A:105
- VAL A:151
- GLU A:185
- ILE A:77
- HIS A:186
- PRO A:78
- SER A:57
- VAL A:59
- GLY A:58
- GLY A:60
- LEU A:41
- ARG A:56
- HIS A:158
- GLU A:155
- LEU A:112
- GLN A:65
- HIS A:61
- HIS A:154
- CSD A:111
- GLY A:110
- TYR A:147

### Supplementary Figure 3. Intermolecular interactions

## Ligand-based pharmacophore mapping to the compounds

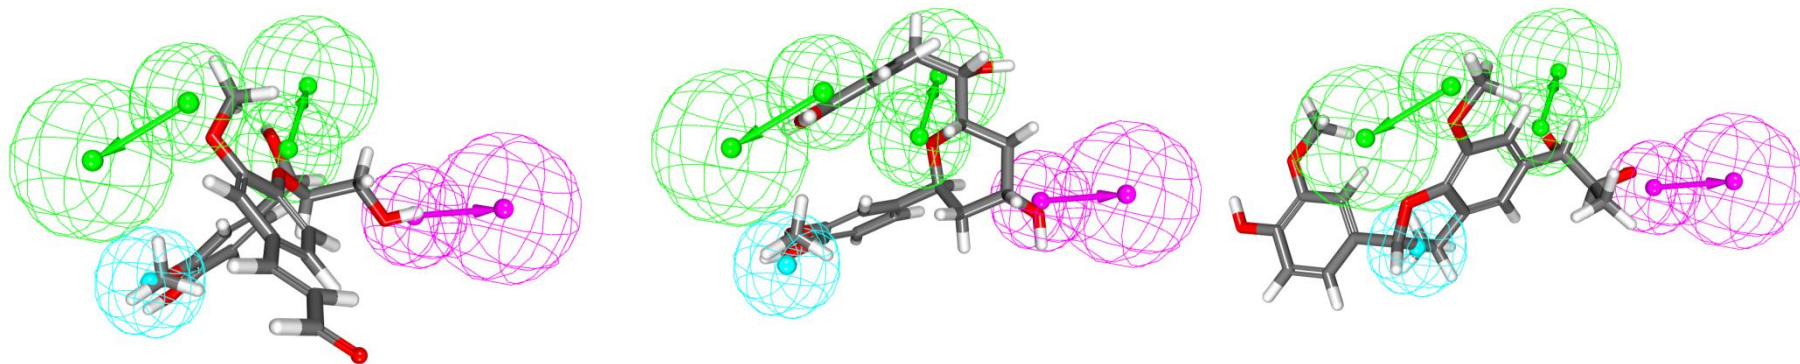

## Structure-based pharmacophore mapping to the compounds

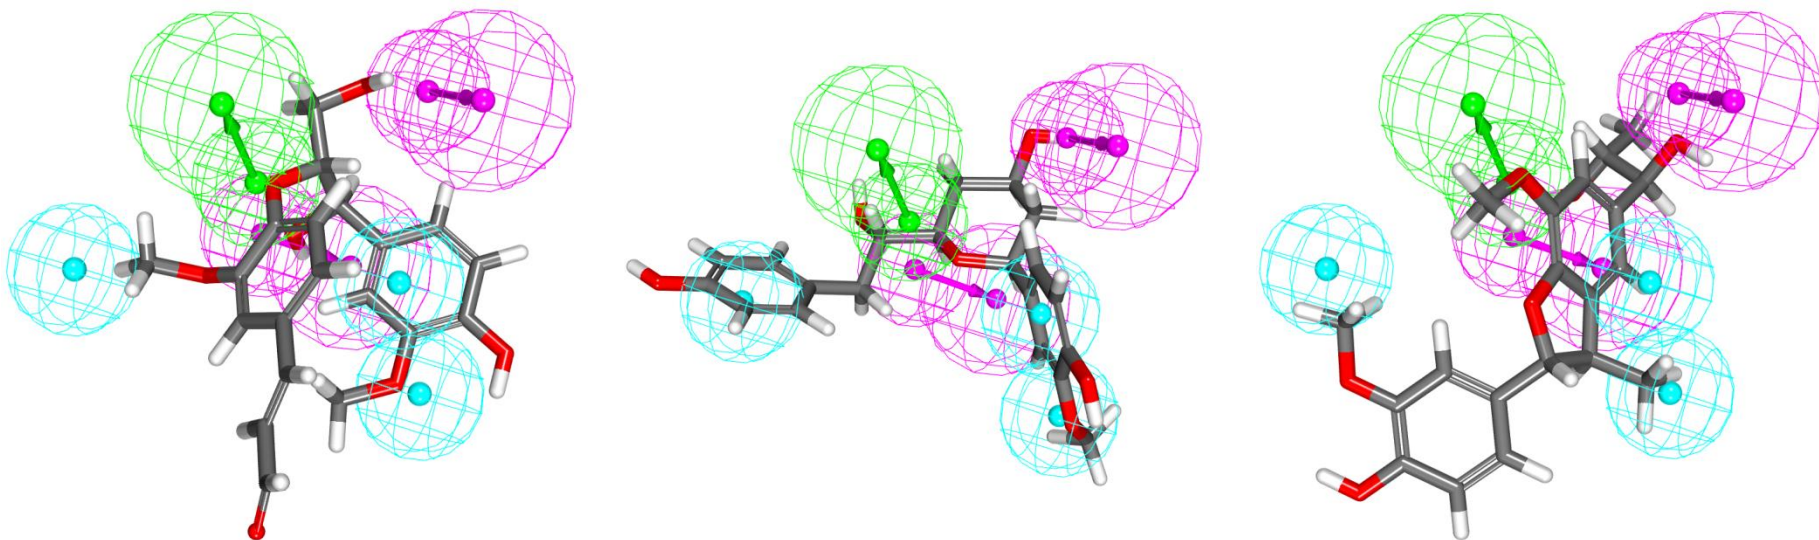

**Supplementary Figure 4. Pharmacophore models and hits alignment**
